# Supplementary material
Source: PubMed Central journal article supplement (PMC4136549)
Supplement: NIHMS581734-supplement-Supplementary_Figures_and_Table.pdf [file NIHMS581734-supplement-Supplementary_Figures_and_Table.pdf]

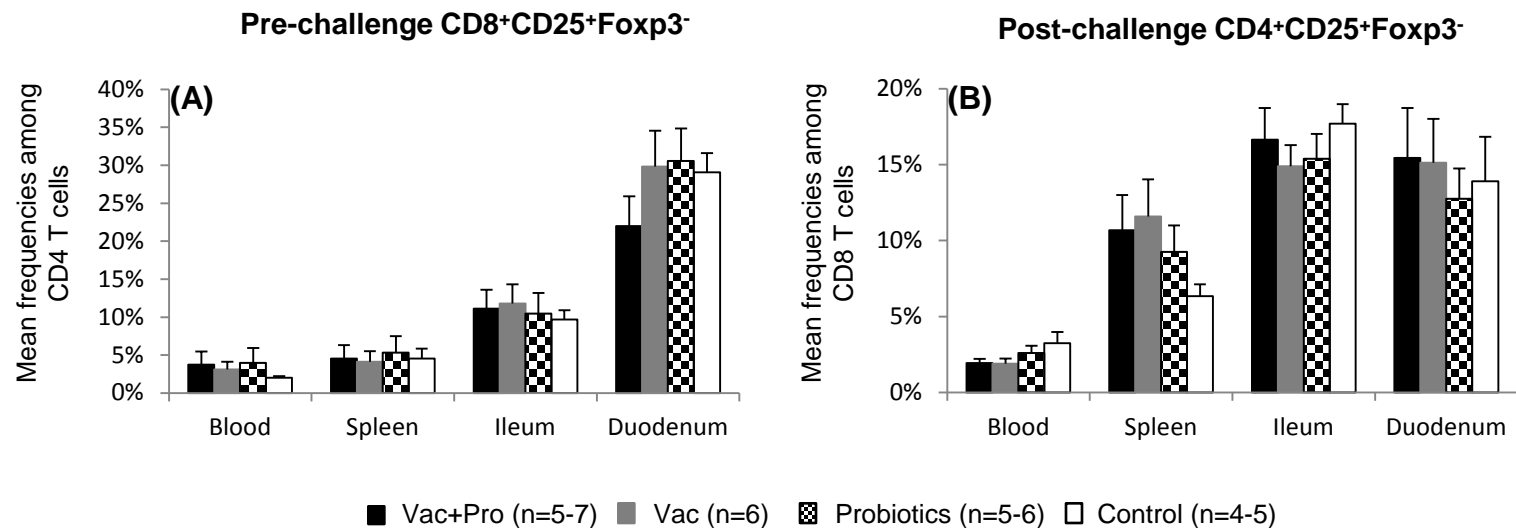

**Supplementary Fig 1:** Probiotic colonization did not affect activated CD8 T cells pre-challenge and CD4 T cells post-challenge in vaccinated animals.

Mean frequencies of CD8<sup>+</sup>CD25<sup>+</sup>Foxp3<sup>-</sup> (pre-challenge, A) and CD4<sup>+</sup>CD25<sup>+</sup>Foxp3<sup>-</sup> (post-challenge, B) T cells among CD4<sup>+</sup> and CD8<sup>+</sup> T cells subsets ( $\pm$  SEM) respectively in blood, spleen, ileum and duodenum. Vac+Pro = 3X AttHRV vaccinated + probiotic colonized (LGG+Bb12), Vac = 3X AttHRV vaccinated only, Probiotics = probiotic colonized only, Control = non-vaccinated and non-colonized control.

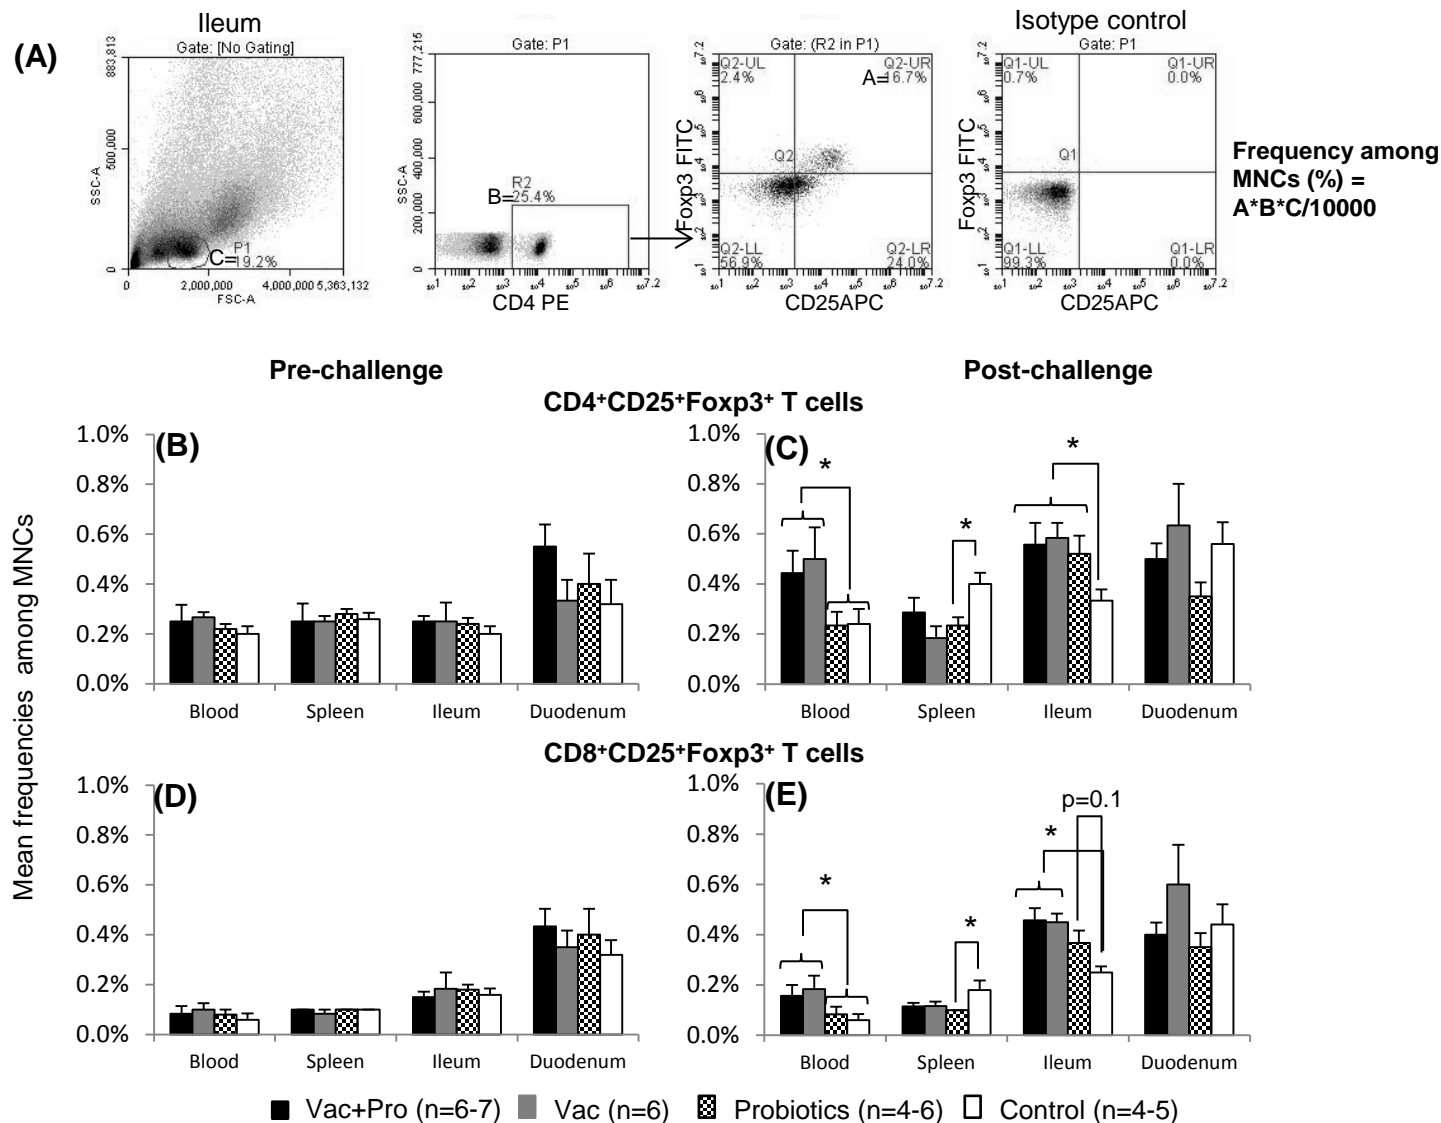

**Supplementary Fig 2:** Probiotic colonization and/or vaccination increased CD4 and CD8 Treg in blood and ileum post-VirHRV challenge. Representative dot plot of frequencies of ileal CD4<sup>+</sup>CD25<sup>+</sup>Fopx3<sup>+</sup> T cells from Vac+Pro group (A) and formula for determining frequencies of these cells among total MNCs. Mean frequencies (n=4-7/group pre and post-challenge) of CD4<sup>+</sup>CD25<sup>+</sup>Fopx3<sup>+</sup> (B = pre-challenge, C = post-challenge), CD8<sup>+</sup>CD25<sup>+</sup>Fopx3<sup>+</sup> (D = pre-challenge, E = post-challenge) and CD4<sup>+</sup>CD25<sup>-</sup>Fopx3<sup>+</sup> T cells (F = pre-and post-challenge) ± SEM in blood, spleen, ileum and duodenum. Significant differences between groups are indicated with \* (p<0.05), as determined by non-parametric Kruskal-wallis rank sum test. Vac+Pro = 3X AttHRV vaccinated + probiotic colonized (LGG+Bb12), Vac = 3X AttHRV vaccinated only, Probiotics = probiotic colonized only, Control = non-vaccinated and non-colonized control.

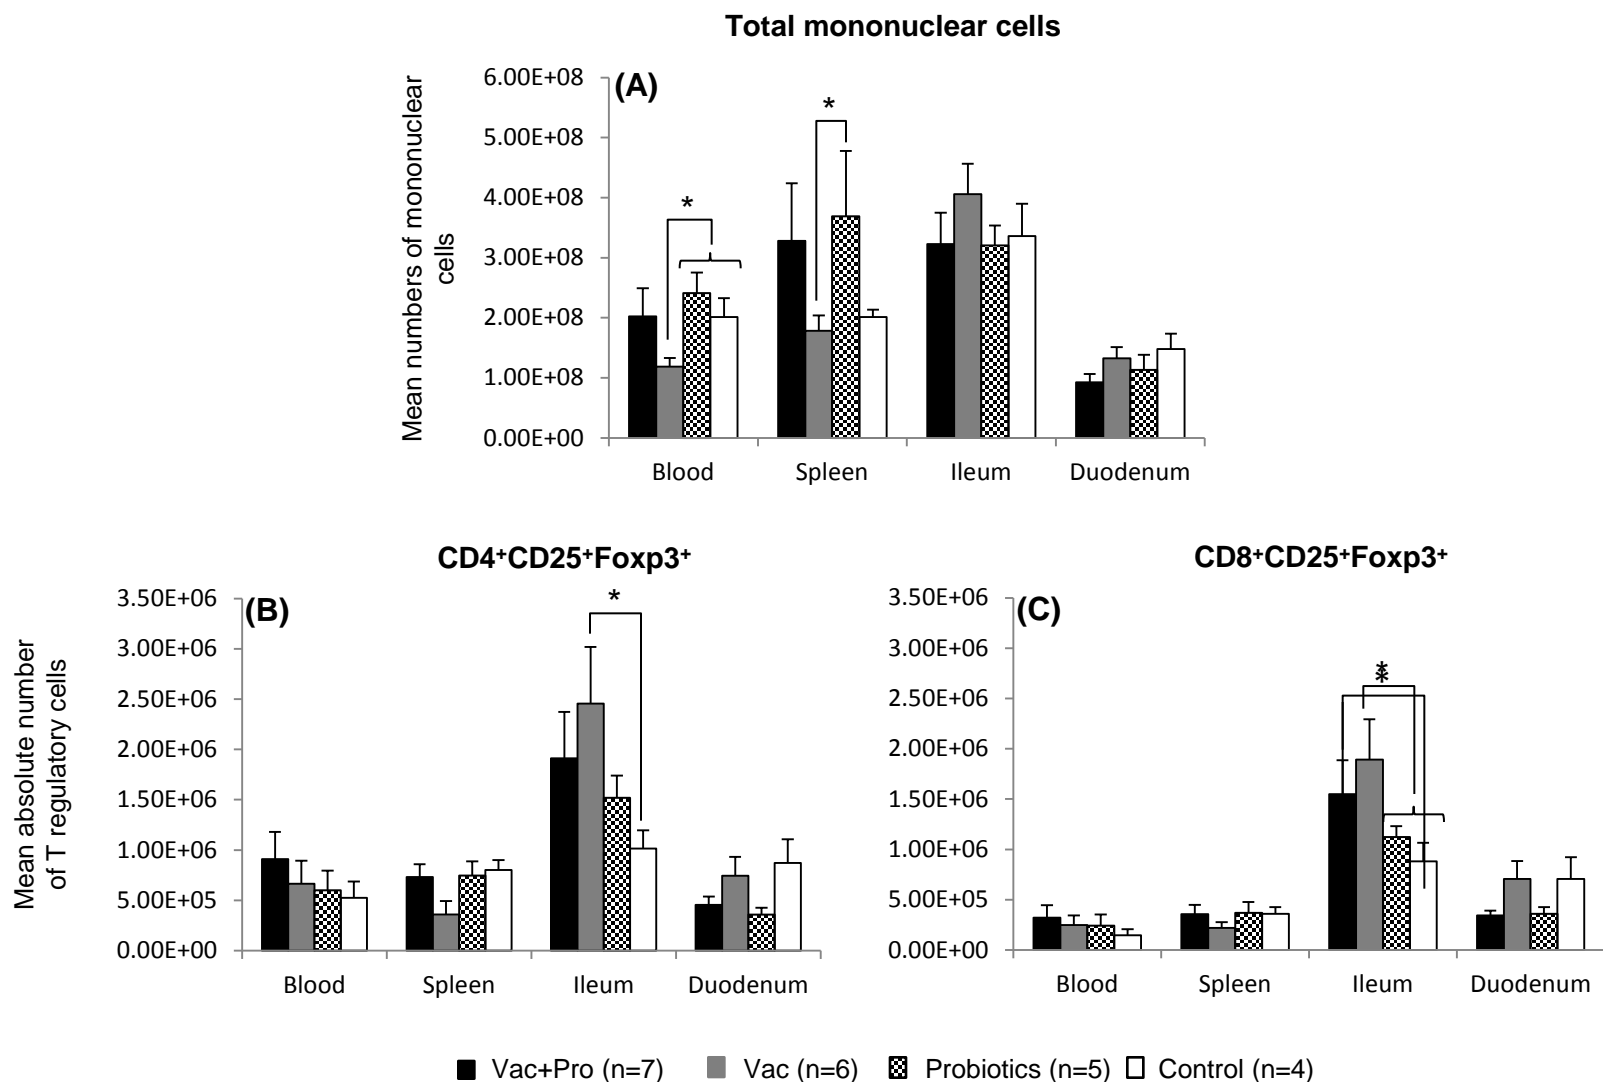

**Supplementary Fig. 3:** Vaccination increased absolute numbers of intestinal natural CD4 and CD8 T regulatory cells post-challenge.

Mean absolute numbers of mononuclear cells (A), CD4+CD25+Foxp3+ (B) and CD8+CD25+Foxp3+ (C) cells  $\pm$  SEM post-challenge in blood, spleen, ileum and duodenum in different groups. Significant differences between groups are indicated with \* ( $p < 0.05$ ), as determined by non-parametric Kruskal-wallis rank sum test. Vac+Pro = 3X AttHRV vaccinated + probiotic colonized (LGG+Bb12), Vac = 3X AttHRV vaccinated only, Probiotics = probiotic colonized only, Control = non-vaccinated and non-colonized control

1 **Supplementary Table I:** Mean probiotic (LGG+Bb12) counts ( $\pm$  standard deviation) in small and large intestines of probiotic  
 2 colonized groups.

| Intestinal<br>sections | Pre-challenge (CFU/g)*                          |                                                 | Post-challenge (CFU/g)*                   |                                           |
|------------------------|-------------------------------------------------|-------------------------------------------------|-------------------------------------------|-------------------------------------------|
|                        | PID27/PCD0**                                    |                                                 | PID34/PCD7**                              |                                           |
|                        | Vac+Pro (n=5)                                   | Pro (n=5)                                       | Vac+Pro <sup>†</sup> (n=3)                | Pro (n=6)                                 |
| Duodenum               | $5.5 \times 10^4 (\pm 4.2 \times 10^4)$         | $7.8 \times 10^5 (\pm 1.2 \times 10^6)$         | $7.9 \times 10^4 (\pm 6.9 \times 10^4)$   | $1.7 \times 10^7 (\pm 2.0 \times 10^7)$   |
| Jejunum                | $1.5 \times 10^7 (\pm 2.2 \times 10^7)$         | $9.6 \times 10^5 (\pm 1.0 \times 10^6)$         | $1.1 \times 10^4 (\pm 1.3 \times 10^4)$   | $1.4 \times 10^7 (\pm 1.7 \times 10^6)$   |
| Ileum                  | $7.2 \times 10^6 (\pm 7.5 \times 10^6)$         | $3.8 \times 10^6 (\pm 2.9 \times 10^6)$         | $1.4 \times 10^5 (\pm 3.7 \times 10^4)$   | $1.5 \times 10^8 (\pm 6.1 \times 10^7)$   |
| cecum                  | $1.7 \times 10^{10} (\pm 1.6 \times 10^{10})^A$ | $5.2 \times 10^{10} (\pm 5.9 \times 10^{10})^A$ | $2.4 \times 10^7 (\pm 1.2 \times 10^7)^B$ | $1.0 \times 10^7 (\pm 5.5 \times 10^7)^B$ |
| colon                  | $1.3 \times 10^{10} (\pm 1.4 \times 10^{10})^A$ | $1.7 \times 10^{10} (\pm 2.0 \times 10^{10})^A$ | $6.6 \times 10^7 (\pm 8.8 \times 10^7)^B$ | $8.3 \times 10^5 (\pm 2.6 \times 10^8)^B$ |

3 \* CFU/g = Colony forming units/gram

4 \*\* Probiotic counts for different tissues were compared within the group (Vac+Pro or Pro) at pre- (PID27/PCD0) and post-challenge  
 5 (PID34/PCD7) time-points. Different superscript upper-case letters differ significantly (determined by non-parametric Kruskal-wallis  
 6 rank sum test)

7 <sup>†</sup> In Vac+Pro group, intestinal tissues were collected from only 3 out of 7 pigs-
